# Supplementary material
Source: PubMed Central journal article supplement (PMC3472082)
Supplement: NIHMS381681-supplement-supplement_1.pdf [file NIHMS381681-supplement-supplement_1.pdf]

Supplemental Data

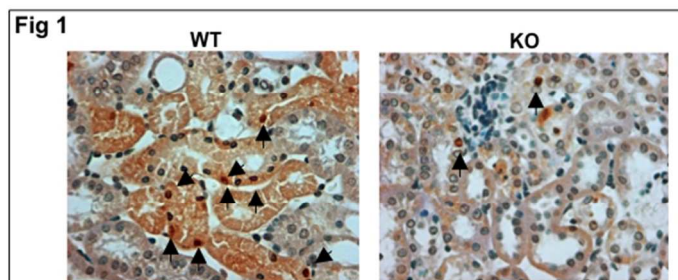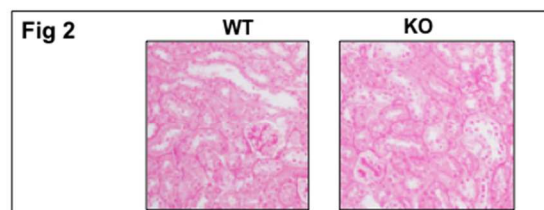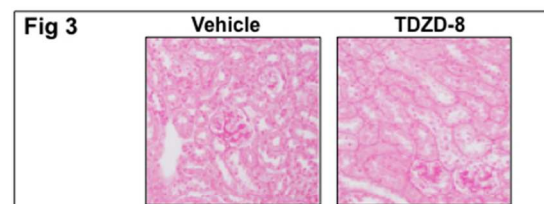

**Fig 1** TUNEL staining of mice kidney 24 h after  $\text{HgCl}_2$  treatment. Arrows indicate brown staining of TUNEL positive nuclei.

**Fig 2** Sirius red staining of WT and KO mice kidney 8 days after  $\text{HgCl}_2$  treatment. x200 original magnification.

**Fig 3** Sirius red staining of kidneys of WT mice treated with vehicle or TDZD-8, 8 days after  $\text{HgCl}_2$  treatment. x200 original magnification.

Supplemental data  
60x81mm (300 x 300 DPI)
